# Supplementary material for: Evaluation of Coronary Artery Stenosis by Quantitative Flow Ratio During Invasive Coronary Angiography: The WIFI II Study (Wire-Free Functional Imaging II)
Source: PubMed Central journal article supplement — Circ Cardiovasc Imaging. 2018 Mar 19;11(3):e007107. doi: 10.1161/CIRCIMAGING.117.007107 (PMC5895131; doi:10.1161/circimaging.117.007107), 2018-03-19
Supplement: hci-11-e007107-s001.pdf [file hci-11-e007107-s001.pdf]

## **SUPPLEMENTAL MATERIAL**

Supplement to: Evaluation of coronary artery stenosis by quantitative flow ratio during invasive coronary angiography.  
The wire-free functional imaging (WIFI II) study

## **Supplemental results**

### *Clinical characteristics according to binary FFR/QFR agreement*

Appendix figure 2 summarizes the baseline clinical and lesions characteristics grouped by FFR/QFR agreement/disagreement. QFR was significantly lower for mismatches compared to matching observations ( $p=0.01$ ). For the mismatches, significant more lesions were located in the LAD compared to matching LAD observations ( $p=0.04$ ). In LAD observations with mismatch, 46 % of FFR values were in the 0.77-0.83 interval compared to 19 % for the matching LAD observations ( $p=0.006$ ). For the numerical precision (mean difference FFR-QFR), there was no statistical significant difference for LAD (0.006 for matches versus 0.008,  $p=0.90$ ) nor for other vessels.

### *Predictors of absolute FFR and QFR agreement*

There was no correlation between FFR and 2D-QCA (Spearman's rho -0.20). Hence, both were evaluated in the same model. In the unadjusted analysis, body mass index (BMI), vessel (Obtuse marginal branch), %DS (2D-QCA) and FFR were predictors of the absolute FFR-QFR difference (all  $p<0.02$ ) and were thus included in the multiple regression model. In the adjusted model, only FFR was an independent predictor of FFR-QFR agreement (Supplemental table 3).

## Supplemental tables

**Supplemental table 1: Lesion characteristics (2D-QCA)**

| Lesion characteristics (2D QCA) |           |
|---------------------------------|-----------|
| <b>Overall (n=240)</b>          |           |
| Diameter stenosis (%)           | 42±17     |
| Minimum lumen diameter (mm)     | 1.25±0.68 |
| Reference diameter (mm)         | 2.44±1.10 |
| Lesion length (mm)              | 8.36±5.33 |
| <b>Values are mean ± SD</b>     |           |

**Supplemental table 2: Baseline characteristics grouped by FFR and QFR binary agreement**

|                                                 | Match (n=198)         | Mismatch (n=42)      | p    |
|-------------------------------------------------|-----------------------|----------------------|------|
| <b>Clinical</b>                                 |                       |                      |      |
| Age, years                                      | 62±8                  | 62±8                 | 0.12 |
| Male                                            | 130 (67%)             | 33 (79%)             | 0.15 |
| Smoking                                         | 122 (62%)             | 27 (64%)             | 0.86 |
| BMI, kg/m <sup>2</sup>                          | 27 (IQR:24-29)        | 26 (IQR:24-29)       | 0.68 |
| Hypertension                                    | 55 (27%)              | 9 (21%)              | 0.45 |
| Diabetes                                        | 17 (9%)               | 6 (14%)              | 0.25 |
| Family history of CAD                           | 79 (40%)              | 15 (36%)             | 0.30 |
| <b>Clinical presentation</b>                    |                       |                      |      |
| Stable angina                                   | 57 (29%)              | 16 (38%)             | 0.27 |
| Atypical angina                                 | 76 (38%)              | 11 (26%)             | 0.16 |
| Non specific angina                             | 27 (11%)              | 5 (12%)              | 1.00 |
| Diamond-Forrester score                         | 0.46 (IQR:0.29-0.63)  | 0.48 (IQR:0.36-0.76) | 0.36 |
| <b>Lesion location</b>                          |                       |                      |      |
| Left main stem                                  | 8 (4%)                | 2 (5%)               | 0.21 |
| LAD                                             | 96 (50%)              | 28 (67%)             |      |
| Diagonal branch                                 | 17 (9%)               | 0 (0%)               |      |
| Left circumflex artery                          | 25 (13%)              | 3 (7%)               |      |
| Obtuse marginal branch                          | 19 (10%)              | 3 (7%)               |      |
| Right coronary artery                           | 33 (17%)              | 6 (14%)              |      |
| Proximal disease                                | 103 (52%)             | 17 (40%)             |      |
| Multivessel disease                             | 66 (33%)              | 13 (31%)             |      |
| <b>Lesion characteristics</b>                   |                       |                      |      |
| FFR                                             | 0.85 (IQR:0.77-0.91)  | 0.81 (IQR:0.78-0.87) | 0.10 |
| QFR                                             | 0.85 (IQR: 0.77-0.90) | 0.80 (IQR:0.75-0.85) | 0.01 |
| % DS                                            | 43 (IQR:35-53)        | 43 (IQR:35-56)       | 0.80 |
| <b>Values are n (%), mean±SD or median(IQR)</b> |                       |                      |      |

Mismatch was defined as FFR>0.80 and QFR≤0.80 or FFR≤0.80 and QFR>0.80. BMI denotes body mass index, CAD: coronary artery disease, FFR: Fractional flow reserve, QFR: Quantitative flow reserve, DS: diameter stenosis and IQR: Interquartile range.

**Supplemental table 3: Predictors of absolute FFR and QFR agreement**

| Multiple linear regression                       |                |
|--------------------------------------------------|----------------|
| <i>Predictors of QFR-FFR absolute difference</i> |                |
| Constant                                         | -1.90 (0.57)   |
| Obtuse marginal branch                           | 0.30 (0.23)    |
| BMI                                              | -0.13 (0.013)  |
| FFR                                              | -1.17 (0.53) * |
| % DS (2D-QCA)                                    | 0.00 (0.00)    |

**Coefficient (SE). \*95% significance**

**Supplemental table 4: Studies on FFR computation based on coronary CTA and invasive coronary angiography**

|                               | Modality        | Design                      | Patients (Vessels) | FFR                     | FFR $\leq$ 0.80 | SD     | AUC  |
|-------------------------------|-----------------|-----------------------------|--------------------|-------------------------|-----------------|--------|------|
| Noergaard et al <sup>1</sup>  | CTA (HeartFlow) | Prospective, multicenter    | 254 (484)          | -                       | 17 *            | 0.07   | 0.93 |
| Renker et al <sup>2</sup>     | CTA (Siemens)   | Retrospective, singlecenter | 53 (67)            | -                       | 30              | -      | 0.92 |
| Kim et al <sup>3</sup>        | CTA (HeartFlow) | Prospective, multicenter    | 44 (48)            | 0.70 $\pm$ 0.14         | -               | 0.14   | -    |
| Nakazato et al <sup>4</sup>   | CTA (HeartFlow) | Prospective, Multicenter    | 82 (150)           | 0.85 $\pm$ 0.08         | 23              | 0.05 † | 0.79 |
| Koo et al <sup>5</sup>        | CTA (HeartFlow) | Prospective, Multicenter    | 103 (159)          | -                       | -               | 0.12   | 0.90 |
| Tu et al <sup>6</sup>         | ICA (QFR)       | Prospective, multicenter    | 73 (84)            | 0.84 $\pm$ 0.08         | 32              | 0.06   | 0.92 |
| Papafaklis et al <sup>7</sup> | ICA (VFAI)      | Retrospective, multicenter  | 120 (139)          | 0.84 (range: 0.75-0.90) | 37              | 0.09   | 0.92 |
| Morris et al <sup>8</sup>     | ICA (vFFR)      | Prospective, singlecenter   | 19 (22) ‡          | -                       | 20              | 0.10   | -    |
| Westra et al (WIFI II)        | ICA (QFR)       | Prospective, singlecenter   | 191 (292)          | 0.85 (range: 0.35-1.04) | 36              | 0.08   | 0.86 |

\* In the NXT trial manuscript, the authors report 21% lesions with FFR $\leq$ 0.80. However, an FFR value of 0.50 was assigned to lesions with %DS > 90% (n=16). We reported the number of lesions with wire-based FFR $\leq$ 0.80. † Reported in original manuscript as “bias”. It is unclear if bias represents the mean difference (mean CT-FFR was 0.80 and FFR 0.85), standard deviation or absolute error. ‡ Results are reported for the pre-stenting comparison between FFR and vFFR. CTA denotes computed tomography angiography, FFR: Fractional flow reserve, SD: Standard deviation and AUC: Area under the receiver-operating characteristic curve.

Supplemental figures

Supplemental figure 1

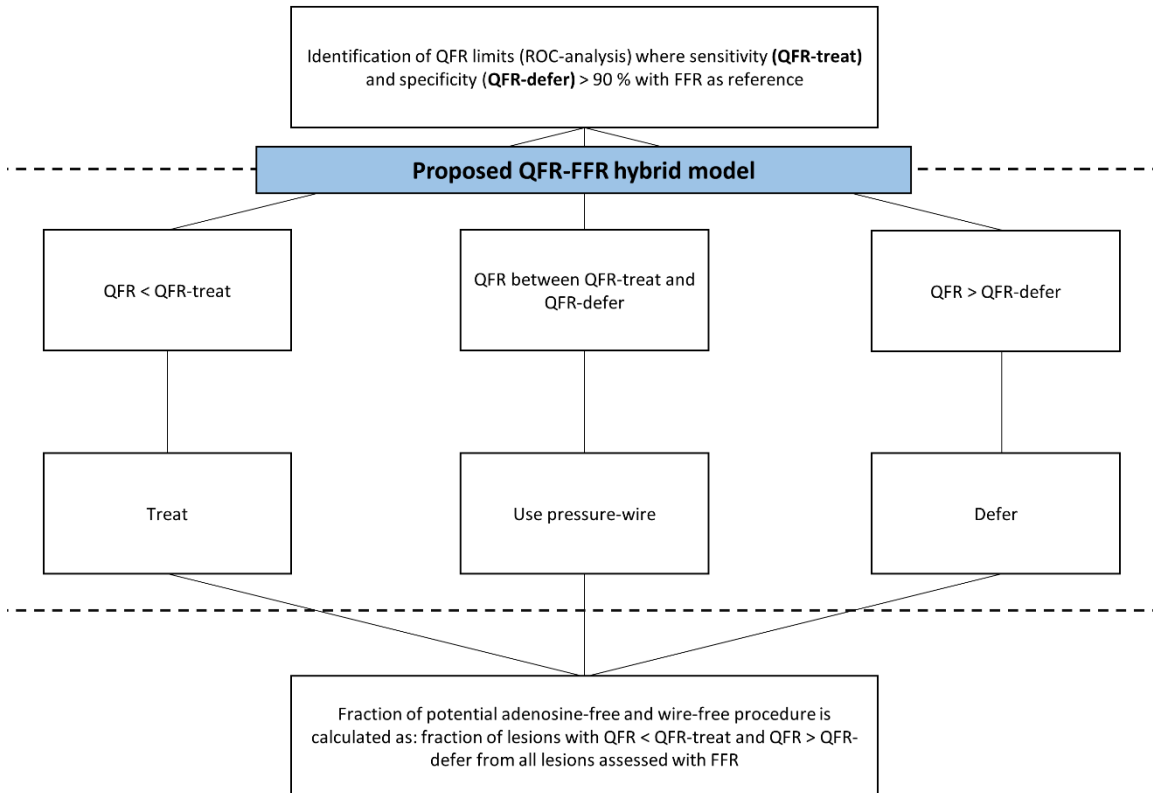

**Supplemental figure 2**

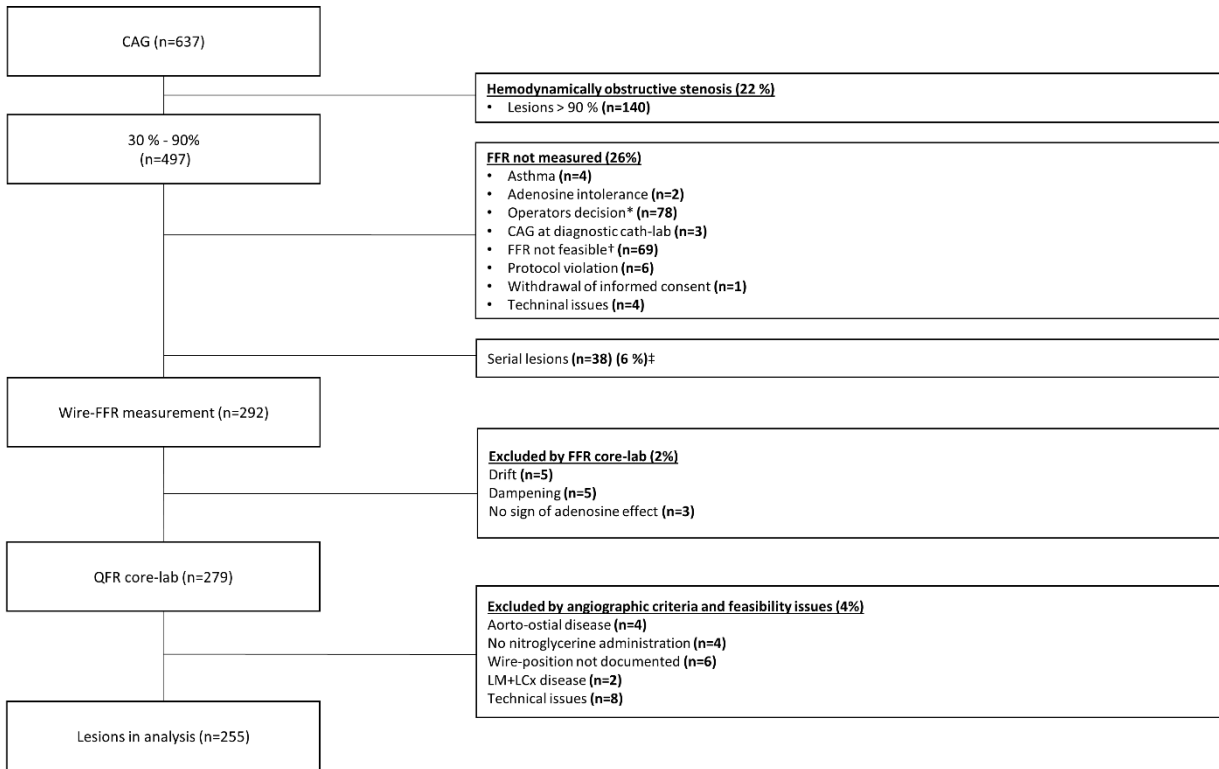



## **Supplemental figure legends**

**Supplemental figure 1: QFR-FFR hybrid model flowchart.**

**Supplemental figure 2: Study enrolment flowchart per lesion.** Numbers n are lesions. \* Lesions evaluated as < 30 % by visual estimate during the procedure are noted here and accounted for the largest portion. † This portion accounted for tortuous vessels, ICA performed at diagnostic cath-labs and time issues related to complexity of the procedure. ‡ Only the distal FFR value was used in vessels with multiple lesions.

## Supplemental references

1. Norgaard BL, Leipsic J, Gaur S, Seneviratne S, Ko BS, Ito H, Jensen JM, Mauri L, De Bruyne B, Bezerra H, Osawa K, Marwan M, Naber C, Erglis A, Park SJ, Christiansen EH, Kaltoft A, Lassen JF, Botker HE and Achenbach S. Diagnostic performance of noninvasive fractional flow reserve derived from coronary computed tomography angiography in suspected coronary artery disease: the NXT trial (Analysis of Coronary Blood Flow Using CT Angiography: Next Steps). *Journal of the American College of Cardiology*. 2014;63:1145-55.doi:10.1016/j.jacc.2013.11.043.
2. Renker M, Schoepf UJ, Wang R, Meinel FG, Rier JD, Bayer RR, 2nd, Mollmann H, Hamm CW, Steinberg DH and Baumann S. Comparison of diagnostic value of a novel noninvasive coronary computed tomography angiography method versus standard coronary angiography for assessing fractional flow reserve. *The American journal of cardiology*. 2014;114:1303-8.doi:10.1016/j.amjcard.2014.07.064.
3. Kim KH, Doh JH, Koo BK, Min JK, Erglis A, Yang HM, Park KW, Lee HY, Kang HJ, Kim YJ, Lee SY and Kim HS. A novel noninvasive technology for treatment planning using virtual coronary stenting and computed tomography-derived computed fractional flow reserve. *JACC Cardiovascular interventions*. 2014;7:72-8.doi:10.1016/j.jcin.2013.05.024
4. Nakazato R, Park HB, Berman DS, Gransar H, Koo BK, Erglis A, Lin FY, Dunning AM, Budoff MJ, Malpeso J, Leipsic J and Min JK. Noninvasive fractional flow reserve derived from computed tomography angiography for coronary lesions of intermediate stenosis severity: results from the DeFACTO study. *Circulation Cardiovascular imaging*. 2013;6:881-9.doi:10.1161/CIRCIMAGING.113.000297.
5. Koo BK, Erglis A, Doh JH, Daniels DV, Jegere S, Kim HS, Dunning A, DeFrance T, Lansky A, Leipsic J and Min JK. Diagnosis of ischemia-causing coronary stenoses by noninvasive fractional flow reserve computed from coronary computed tomographic angiograms. Results from the prospective multicenter DISCOVER-FLOW (Diagnosis of Ischemia-Causing Stenoses Obtained Via Noninvasive Fractional Flow Reserve) study. *Journal of the American College of Cardiology*. 2011;58:1989-97.doi:10.1016/j.jacc.2011.06.066
6. Tu S, Westra J, Yang J, von Birgelen C, Ferrara A, Pellicano M, Nef H, Tebaldi M, Murasato Y, Lansky A, Barbato E, van der Heijden LC, Reiber JH, Holm NR, Wijns W and Group FPTS. Diagnostic Accuracy of Fast Computational Approaches to Derive Fractional Flow Reserve From Diagnostic Coronary Angiography: The International Multicenter FAVOR Pilot Study. *JACC Cardiovascular interventions*. 2016;9:2024-2035.doi:10.1016/j.jcin.2016.07.013

7. Papafaklis MI, Muramatsu T, Ishibashi Y, Lakkas LS, Nakatani S, Bourantas CV, Ligthart J, Onuma Y, Echavarría-Pinto M, Tsirka G, Kotsia A, Nikas DN, Mogabgab O, van Geuns RJ, Naka KK, Fotiadis DI, Brilakis ES, Garcia-Garcia HM, Escaned J, Zijlstra F, Michalis LK and Serruys PW. Fast virtual functional assessment of intermediate coronary lesions using routine angiographic data and blood flow simulation in humans: comparison with pressure wire - fractional flow reserve. *EuroIntervention* : journal of EuroPCR in collaboration with the Working Group on Interventional Cardiology of the European Society of Cardiology. 2014;10:574-83.doi:10.4244/EIJY14M07\_01
8. Morris PD, Ryan D, Morton AC, Lycett R, Lawford PV, Hose DR and Gunn JP. Virtual fractional flow reserve from coronary angiography: modeling the significance of coronary lesions: results from the VIRTU-1 (VIRTUal Fractional Flow Reserve From Coronary Angiography) study. *JACC Cardiovascular interventions*. 2013;6:149-57.doi:10.1016/j.jcin.2012.08.024.
